1 **Potential for sexual conflict assessed via testosterone-mediated**  
2 **transcriptional changes in liver and muscle of a songbird**

3 Mark P Peterson<sup>1,\*</sup>; Kimberly A Rosvall<sup>1</sup>; Charlene A Taylor<sup>1</sup>; Jacqueline Ann Lopez<sup>2,3</sup>; Jeong-  
4 Hyeon Choi<sup>2,4</sup>; Charles Ziegenfus<sup>5</sup>; Haixu Tang<sup>2</sup>; John K Colbourne<sup>2,6</sup>; and Ellen D  
5 Ketterson<sup>1</sup>

6 \*Corresponding Author: [petersm@juniata.edu](mailto:petersm@juniata.edu)

7 \*Current Address: Pennsylvania State University, University Park, PA, USA, and Juniata College,  
8 Huntingdon, PA, USA.

9 <sup>1</sup>Dept. of Biology, Center for Integrative Study of Animal Behavior, Indiana University, Bloomington,  
10 IN, USA.

11 <sup>2</sup>Center for Genomics and Bioinformatics, Indiana University, Bloomington, IN.

12 <sup>3</sup>Department of Biological Sciences, University of Notre Dame, Notre Dame, IN, USA

13 <sup>4</sup>Cancer Center, Department of Biostatistics, Georgia Health Sciences University, Augusta, GA, USA.

14 <sup>5</sup>Department of Mathematics, James Madison University, Harrisonburg, VA, USA.

15 <sup>6</sup>School of Biosciences, University of Birmingham, Birmingham, United Kingdom.

16 **Summary**

17 Males and females can be highly dimorphic in metabolism and physiology despite sharing nearly  
18 identical genomes, and males and females both respond phenotypically to elevated testosterone, a  
19 steroid hormone that alters gene expression. Only recently has it become possible to learn how a  
20 hormone like testosterone affects global gene expression in non-model systems, and whether it affects  
21 the same genes in males and females. To investigate the transcriptional mechanisms by which  
22 testosterone exerts its metabolic and physiological effects on the periphery, we compared gene  
23 expression by sex and in response to experimentally elevated testosterone in a well-studied bird  
24 species, the dark-eyed junco (*Junco hyemalis*). We identified 291 genes in the liver, and 658 in the  
25 pectoralis muscle that were differentially expressed between males and females. In addition, we  
26 identified 1,727 genes that were differentially expressed between testosterone-treated and control  
27 individuals in at least one tissue and sex. Testosterone-treatment altered the expression of only 128  
28 genes in both males and females in the same tissue, and 847 genes were affected significantly  
29 differently by testosterone-treatment in the two sexes. These substantial differences in transcriptional  
30 response to testosterone suggest that males and females may employ different pathways when  
31 responding to elevated testosterone, despite the fact that many phenotypic effects of experimentally  
32 elevated testosterone are similar in the sexes. In contrast, of the 121 genes that were affected by  
33 testosterone-treatment in both sexes, 78% were regulated in the same direction (e.g. either higher or  
34 lower in testosterone-treated than control) in both males and females. Thus, it appears that testosterone  
35 acts through both unique and shared transcriptional pathways in males and females, suggesting multiple  
36 mechanisms by which sexual conflict can be mediated.

## 37 **Introduction**

38 Males and females often face divergent selective pressures due to inherent differences in reproductive  
39 strategy, and these differences can be reflected in life history traits, including reproductive effort,  
40 longevity, growth, and metabolism (Cox and Calsbeek, 2009). In several species, some life history  
41 traits (e.g., longevity and basal metabolic rate) appear to be at sub-optimum levels for each sex, and  
42 selection related to these phenotypes acts in opposite directions on males and females (Berg and  
43 Maklakov, 2012; Boratynski *et al.*, 2010). This suggests that sexually antagonistic selection has led to a  
44 phenotypic compromise (Bonduriansky and Chenoweth, 2009; Chapman *et al.*, 2003). Sexually  
45 dimorphic gene expression is thought to provide a solution to sexual conflict (van Doorn, 2009), given  
46 that males and females share nearly identical genomes (reviewed in Ellegren and Parsch, 2007).  
47 Sexually dimorphic patterns of gene expression are thought to account for many of the physiological  
48 differences between the sexes (Xu *et al.*, 2012). For example, sex differences in liver gene expression  
49 are substantial in rodents (Corton *et al.*, 2012), and explain several known sex differences in liver  
50 metabolism (Gatti *et al.*, 2010).

51 In many vertebrate species, androgens, such as testosterone (T), are one of the key regulators of sex  
52 differences in many aspects of adult phenotype, including growth and metabolism (Cox *et al.*, 2009;  
53 Woodward, 1993; Arnold *et al.*, 1997; Wikelski *et al.*, 1999). T plays a major role in directing the  
54 balance of energy expenditure (Marler and Moore, 1988), generally shifting energy away from  
55 metabolic processes of self-maintenance, such as immune function (Folstad and Karter, 1992), toward  
56 short-term reproductive efforts, such as courtship (Arnold, 1975; Wiley and Goldizen, 2003) and  
57 territory defense (Marler *et al.*, 1995). These phenotypic effects often occur in both males and females,  
58 but are likely to affect reproductive success differently in each sex (Ketterson *et al.*, 2005). Thus, there  
59 is likely to be conflict between the sexes over the optimal level of circulating T (Boratynski *et al.*,  
60 2010; Mokkonen *et al.*, 2012).

61 Comparative studies have shown that endogenous levels of T are highly correlated between males and  
62 females among species, including in birds (Ketterson *et al.*, 2005; Moller *et al.*, 2005) and fish (Mank,  
63 2007), raising the possibility that selection on circulating T levels in one sex may lead to a similar  
64 change in circulating T in the opposite sex. If, however, the sexes differ in their phenotypic and  
65 transcriptional response to circulating T, they may be able to reduce this conflict, and each sex may be  
66 better able to reach its own optimum phenotypic values (Rice, 1984). Behavior and physiology are  
67 known to be sensitive to experimentally elevated T, sometimes in both sexes, sometimes in only one.

68 For example, immune function is sensitive to experimental elevation of T in males of some species  
69 (Roberts *et al.*, 2004), but is responsive to T in females of only some, but not all, of these species  
70 (Ketterson *et al.*, 2005). The fact that phenotypic sensitivity to T varies between species and sexes  
71 strongly suggests evolutionary lability in the genes and phenotypes that respond to T.

72 To address the role of sexual dimorphism and T in mediating phenotypes via gene expression in a  
73 natural system, we studied gene expression in the liver and pectoralis of a wild songbird, the dark-eyed  
74 junco (*Junco hyemalis*) (Linnaeus, 1758). The dark-eyed junco is a mildly dimorphic North American  
75 sparrow (Nolan *et al.*, 2002) that has been the focus of ecological research for nearly a century (Rowan,  
76 1925; Ketterson *et al.*, 2009; Miller, 1941), and recent genomic tools have expanded these studies  
77 (Peterson *et al.*, 2012). Sex differences and the phenotypic effects of experimentally elevated T have  
78 been studied extensively (Ketterson *et al.*, 2009; Ketterson *et al.*, 1991) providing a solid ecological  
79 foundation on which to interpret findings from genomic tools (Peterson *et al.*, 2012).

80 In particular, past research on free-living male and female juncos has detailed many phenotypic  
81 consequences of experimental T-treatments that maintain levels of T near the early breeding season  
82 peak for each sex (Ketterson *et al.*, 1992; Ketterson *et al.*, 1996; Ketterson *et al.*, 2005). Both male and  
83 female juncos respond phenotypically to experimentally elevated T by decreasing immune function  
84 (Casto *et al.*, 2001; Zysling *et al.*, 2006), and decreasing body mass (Clotfelter *et al.*, 2004; Ketterson *et*  
85 *al.*, 1991) along with a number of behavioral responses (reviewed in Ketterson *et al.*, 2005; Ketterson  
86 *et al.*, 2009). However, only males, and not females, increase their activity and home-range size in  
87 response to experimental T (Reichard and Ketterson, 2012; Lynn *et al.*, 2000; Chandler *et al.*, 1994).  
88 The net result of these and other phenotypic effects of T-treatment is an increase in reproductive fitness  
89 for males (Reed *et al.*, 2006) but a decrease in fitness for females (Gerlach and Ketterson, 2013),  
90 providing direct experimental support for the hypothesis that there is sexual conflict over optimal T  
91 levels in this species. As such, this is an ideal system in which to investigate the molecular mechanisms  
92 by which sexual conflict occurs and/or is resolved, by specifically asking whether the sexes diverge in  
93 the gene expression response to T-treatment.

94 Many sexually dimorphic and androgen-responsive phenotypes are mediated directly by changes in  
95 peripheral tissues such as liver and muscle. The liver plays a key role in whole-body metabolism,  
96 including gluconeogenesis, glycogenolysis, glycogen storage, amino acid synthesis, lipid synthesis and  
97 breakdown, and the production of insulin-like growth factor (Heubi, 1993; Miura *et al.*, 1992). Further,  
98 the liver is a key regulator of sexually dimorphic immune function – male mice are more susceptible to

99 liver infection than females are (Diodato *et al.*, 2001), and these differences are androgen-mediated  
100 (Mock and Nacy, 1988) through gene expression changes (Delic *et al.*, 2010). Sex differences in gene  
101 expression in liver can be substantial (Corton *et al.*, 2012), and are largely driven by activational effects  
102 of hormones (van Nas *et al.*, 2009). The physiological demands of flight are thought to have resulted  
103 in a larger liver in birds compared to mammals (Proctor, 1993), making hormonal influences of this  
104 organ particularly important in birds.

105 Similarly, muscle tissues are also often sensitive to T and play a primary role in mediating dimorphic  
106 behavior and physiology (Arnold *et al.*, 1997; Baur *et al.*, 2008; Fernando *et al.*, 2010). Gene  
107 expression appears to account for many sexually dimorphic muscle features in humans (Maher *et al.*,  
108 2009; Welle *et al.*, 2008) and mice (Yang *et al.*, 2006). Androgen treatment leads to increases in  
109 strength and lean muscle mass (Hartgens and Kuipers, 2004), and these effects may be linked to T-  
110 mediated changes in gene expression (Montano *et al.*, 2007; Labrie *et al.*, 2005). Further, the effects of  
111 exercise on gene expression in muscle are sex-specific in humans (Liu *et al.*, 2010), suggesting that  
112 different transcriptional pathways may underlie some of the sex differences in muscle. The pectoralis  
113 muscle, which is the major avian flight muscle, accounts for approximately 20% of the mass of an  
114 individual bird (Marden, 1987). Androgen receptor is expressed in the pectoralis (Feng *et al.*, 2010),  
115 and T modifies the expression of at least two candidate genes related to muscle function in the  
116 pectoralis (Fuxjager *et al.*, 2012). Thus, the pectoralis provides an important, androgen sensitive tissue  
117 in which to investigate the sex-specific effects of hormones in the periphery.

118 We anticipated that many of the genes differentially expressed between sexes and in response to T-  
119 treatment in the liver and the pectoralis would have functions related to metabolism, muscle  
120 development, and immune function. Because many of the metabolic effects of T are similar in male and  
121 female juncos, we also predicted that many genes whose expression was altered in response to T-  
122 treatment in one sex would also be altered in the other sex. However, we also predicted that some genes  
123 would respond to T-treatment in one sex, but not the other, consistent with previous findings that (i) not  
124 all physiological effects of T are present in both sexes (Ketterson *et al.*, 2005) and (ii) the sexes respond  
125 differently to T-treatment at the level of gene transcription in the brain (Peterson *et al.*, 2013) providing  
126 a possible solution to the sexual conflict over T-levels observed in previous studies on free-living  
127 juncos (Gerlach and Ketterson, 2013; Reed *et al.*, 2006).

## 128 **Materials and Methods**

### 129 *Animal collection and treatment*

130 Adult dark-eyed juncos (14 male, 12 female) from near Mountain Lake Biological Station (Pembroke,  
131 VA; 37° 22' 31"N, 80° 31' 24"W) were captured, held in a semi-naturalist aviary, and treated as  
132 described in a previous study analyzing neural tissues (Peterson *et al.*, 2013). Briefly, T-treated  
133 individuals were implanted with silastic tubing filled with crystalline T (males: two 10 mm implants;  
134 females one 5 mm implant; Sigma-Aldrich, St. Louis, Missouri, USA), and control individuals were  
135 implanted with one 10 mm empty implant. These T implants result in levels of T near the physiological  
136 maximum in each sex (Ketterson *et al.*, 2005). Thus, while all animals had T levels above any threshold  
137 necessary to maintain reproductive physiology and behavior, animals given T implants had T levels that  
138 were at the high end of natural variation. Notably, this implant regiment has repeatedly been shown to  
139 affect many different phenotypes in male and female juncos, and experimental treatment with these T  
140 implants reveals that there is sexual conflict over T levels in this system – above average T levels are  
141 selectively advantageous for males and disadvantageous for females (see Gerlach and Ketterson, 2013;  
142 Ketterson *et al.*, 2009; and Reed *et al.*, 2006; summarized in Introduction).

143 We note that direct and indirect mechanisms of action and interaction with natural hormones are  
144 important to consider when evaluating our results for two reasons. First, our implants used T, which can  
145 be aromatized into estradiol, and thus, several of the effects described here may be mediated directly by  
146 estradiol after local conversion via aromatase (Herbst and Bhasin, 2004). These sex steroids may act  
147 directly on muscle tissue, and they also may directly alter activity, metabolism or other aspects of  
148 behavior and physiology that lead to indirect effects on gene expression in liver or muscle (Park *et al.*,  
149 2012).

150 Furthermore, we used intact animals in breeding condition to ensure that seasonally variable aspects of  
151 behavior and physiology were characteristic of the breeding season, mimicking previous studies that  
152 have demonstrated sex differences in the phenotypic and fitness consequences of T in otherwise normal  
153 breeding birds. Importantly, the effects seen here likely reflect the mechanisms of action (i) in previous  
154 implant studies (e.g., Ketterson *et al.*, 1996; Gerlach and Ketterson, 2013; Reed *et al.*, 2006; Clotfelter  
155 *et al.*, 2004) as well as (ii) those that might occur in response to evolutionary increases in T levels  
156 (Ketterson *et al.*, 2009).

157 After 26 days of exposure to implants, individuals were euthanized by overdose of isoflurane, and  
158 tissues were collected rapidly (within 15 minutes) to ensure minimal RNA degradation (Cheviron *et al.*,  
159 2011). Approximately two cubic centimeters from the tip of the right lobe of the liver and  
160 approximately one cubic centimeter from near the midline the pectoralis muscle were collected from all  
161 individuals. Other collected tissues remain available for future analyses. Sexes and treatments were  
162 balanced across day and time of sacrifice (between 0700 and 1230). All animal methods were reviewed  
163 and approved by the Institutional Animal Care and Use Committee at Indiana University –  
164 Bloomington (Protocol #09-037).

### 165 ***cDNA preparation and hybridization***

166 Microarray experiments were conducted as described in (Peterson *et al.*, 2012; Peterson *et al.*, 2013)  
167 following (Lopez and Colbourne, 2011). RNA from liver and pectoralis was extracted in TRIzol  
168 following manufacturer directions (Invitrogen, Carlsbad, CA, USA). All extracted RNA assessed on  
169 Agilent Bioanalyzer (Santa Clara, CA, USA) and showed high quality: RNA integrity number  
170 (Schroeder *et al.*, 2006) scores ranged from 6.7-9.2. We then performed double strand cDNA synthesis  
171 with the Invitrogen SuperScript Double-Stranded cDNA Synthesis kit with labeled cDNA using 1 O.D  
172 CY-labeled random nonamer primer (either Cy3 or Cy5) and random hexamer primers and 100U  
173 Klenow fragment per 1ug ds-cDNA (following NimbleGen labeling protocols).

174 A full round robin design was used for each tissue (n = 6 per treatment group for each tissue). Each  
175 sample was tested once, and each treatment group was hybridized against each other group twice (once  
176 with each dye direction; Supplementary Figure 1). Thus, 15 µg of two labeled samples (one Cy3, one  
177 Cy5) were hybridized to each sub-array of a custom Nimblegen 12-plex microarray (Roche Nimblegen,  
178 Inc., Madison, WI) for the dark-eyed junco containing 100,635 features representing 33,545 contigs  
179 (assembled sequencing reads) in triplicate covering 22,765 isogroups (putative genes) based on  
180 transcriptome sequencing (Peterson *et al.*, 2012). Post-hybridization washing and scanning followed  
181 manufacturer's directions (Roche NimbleGen, Inc., Madison, WI). Axon GenePix 4200A scanner  
182 (Molecular Devices, Sunnyvale CA) with GenePix 6.0 software captured array images and NimbleScan  
183 2.4 (Roche NimbleGen, Inc., Madison WI) was used to extract data. We then used the limma package  
184 (Smyth, 2005) in R (R Development Core Team, 2010) to process and normalize raw microarray data.  
185 Microarray data are available in the NCBI Gene Expression Omnibus repository (Accession number  
186 GSE41076).



## 187 *Microarray analysis*

188 Three comparisons for each tissue were made using limma (Smyth, 2005): control males vs. control  
189 females; control males vs. testosterone-treated males; control females vs. testosterone-treated females  
190 (n = 6 per treatment group for each tissue); and the interaction between testosterone and sex. Only  
191 contigs that were expressed in at least one of the compared treatment groups were analyzed (identified  
192 as described in Peterson *et al.*, 2012). Briefly, a gene was considered expressed if at least half of the  
193 individuals in a treatment group had expression scores greater than 97.5% of the random probes on the  
194 array.

195 In most isogroups, the log<sub>2</sub> fold changes between treatment groups, along with the modified t-statistic  
196 and p-value, calculated in the limma package were used for calculations, statistics, and visualization.  
197 However, for isogroups represented by more than one contig (4,288 of 22,765 isogroups), we  
198 calculated the mean t-value of all contigs, and calculated significance on degrees of freedom equal to  
199 the total number of probes scored for the isogroup minus two. The median fold change from contigs  
200 was assigned to each isogroup. We used the R package qvalue (Storey, 2002) to calculate q-values  
201 using a global (across all eight contrasts) false discovery threshold of 0.05 (Benjamini and Hochberg,  
202 1995). To further assess similarity in the effects of T-treatment between males and females, the  
203 direction of gene expression difference between comparisons was examined using a Fisher's exact test  
204 on genes that were differentially expressed between T-treated and control individuals in both sexes.

205 We then used topGO (Alexa and Rahnenfuhrer, 2010) with the weight algorithm (Alexa *et al.*, 2006) to  
206 identify the Gene Ontology (GO) terms (Ashburner *et al.*, 2000) that were significantly over-  
207 represented among the significantly differentially expressed genes in each comparison. Because we  
208 analyzed all three GO topologies, we used a Bonferroni corrected p-value cut-off of 0.0125. GO terms  
209 with fewer than five annotations were excluded from the analysis, and only terms with at least three  
210 genes in the significant gene set are reported.

## 211 **Results**

### 212 *Sex differences*

213 We identified significant differences in expression between control males and control females in both  
214 the liver and pectoralis. In the liver, 291 genes (of 12,206 expressed) were differentially expressed  
215 between control males and females (Figure 1a; Supplementary Table 1), including 218 that were more

216 highly expressed in males than in females and 73 that were more highly expressed in females than in  
217 males. Among these genes, 9 GO terms were significantly over-represented (Table 1).

218 In the pectoralis, 658 genes (of 11,465 expressed) were differentially expressed between control males  
219 and females (Figure 1b; Supplementary Table 1), including 450 that were more highly expressed in  
220 males than in females and 208 that were more highly expressed in females than in males. Among these  
221 genes, 18 GO terms were significantly over-represented (Table 2).

222 Among the genes differentially expressed between the sexes, 117 were significantly different in both  
223 liver and pectoralis (Figure 1c; Supplementary Table 1). Of these genes, 91 were higher in control  
224 males than control females in both tissues and 25 were higher in control females than control males in  
225 both tissues. Only one gene was differentially expressed by sex in opposite directions in the two  
226 tissues: *protein tyrosine phosphatase, receptor type C* was higher in control males than control females  
227 in the liver, but higher in control females than control males in the pectoralis. The general patterns of  
228 gene expression by sex were largely consistent between the two tissues. That is, genes that were more  
229 highly expressed in males than females in one tissue tended to be more highly expressed by males than  
230 females in the other tissue, and vice versa, more than expected by chance (Fisher's exact test,  $p <$   
231 0.0001).

### 232 ***Effect of T-treatment in females***

233 In both liver and pectoralis, we identified significant differences in expression between control females  
234 and T-treated females. In the liver, 801 genes (of 12,064 expressed) were differentially expressed  
235 (Figure 2a; Supplementary Table 1) including 645 that were expressed at a higher level in T-treated  
236 females than controls and 156 that were expressed at a lower level in T-treated females than controls.  
237 Among these genes, 26 GO terms were over-represented (Table 3).

238 In the pectoralis, 402 genes (of 11,413 expressed) were differentially expressed between control  
239 females and T-treated females (Figure 2b; Supplementary Table 1), including 226 that were expressed  
240 at a higher level in T-treated females than controls and 174 that were expressed at a lower level in T-  
241 treated females than controls. Among these genes, 17 GO terms were over-represented (Table 4).

242 Among the genes differentially expressed between the T-treated and control females, 40 were  
243 significantly different in both liver and pectoralis (Figure 2c; Supplementary Table 1). Of these genes,  
244 21 were higher in T-treated than control females in both tissues and 7 were lower in T-treated than



245 control females in both tissues; 12 genes were differentially expressed in opposite directions in both  
246 tissues. More genes were affected in the same direction (i.e., either higher or lower in T-treated than  
247 control females) in both tissues than expected by chance (Fisher's exact test,  $p < 0.05$ , demonstrating  
248 significant similarity in the direction of gene expression change in response to T-treatment in the two  
249 tissues in females.

### 250 *Effect of T-treatment in males*

251 In the liver, 283 genes (of 12,229 expressed) were differentially expressed between T-treated and  
252 control males (Figure 2d; Supplementary Table 1) including 99 that were expressed at a higher level in  
253 T-treated males than controls and 184 that were expressed at a lower level in T-treated males than  
254 controls. Among these genes, one GO term was over-represented: *acetylglucosaminyltransferase*  
255 *activity*.

256 In the pectoralis, 450 genes (of 11,282 expressed) were differentially expressed between control males  
257 and T-treated males (Figure 2e; Supplementary Table 1) including 148 that were expressed at a higher  
258 level in T-treated males than controls and 302 that were expressed at a lower level in T-treated males  
259 than controls. Among these genes, 8 GO terms were over-represented (Table 5).

260 Among the genes differentially expressed between the T-treated and control males, 21 were  
261 significantly different in both liver and pectoralis (Figure 2f; Supplementary Table 1). Of these genes, 6  
262 were higher in T-treated than control males in both tissues and 10 were lower in T-treated than control  
263 males in both tissues; 5 genes were differentially expressed in opposite directions in the tissues. More  
264 genes were affected by T-treatment in the same direction (i.e., either higher or lower in T-treated than  
265 control males) in both tissues than expected by chance (Fisher's exact test;  $p < 0.05$ ), suggesting similar  
266 changes in response to T-treatment in the two tissues in males.

### 267 *Effect of T-treatment in both sexes*

268 In both liver and pectoralis, some genes were differentially expressed between T-treated and control  
269 individuals of both sexes, though many genes were significantly differently affected in the two sexes  
270 (i.e. had a significant interaction effect). In the liver, 58 genes were differentially expressed in both  
271 sexes, representing only 5.6% of the 1,026 genes differentially expressed in at least one sex. There was  
272 a significant interaction between sex and the effect of T-treatment in the liver for 550 genes, including

273 366 (38%) of the genes that were significantly affected by T-treatment in only one sex (Figure 3a;  
274 Supplementary Table 1).

275 In the pectoralis, 68 genes were differentially expressed between T-treated and control individuals of  
276 both sexes, representing only 8.7% of the 784 genes that were differentially expressed in at least one  
277 sex. There was a significant interaction between sex and the effect of T-treatment in the pectoralis for  
278 297 genes, including 189 (26%) of the genes that were only significantly affected by T-treatment in one  
279 sex (Figure 3b; Supplementary Table 1).

280 In the liver, the genes differentially expressed between T-treated and control individuals in both sexes  
281 include 28 that were expressed at a higher level in T-treated individuals than controls in both sexes, 11  
282 that were expressed at a lower level in T-treated individuals than controls in both sexes, and 19 that  
283 were differentially expressed in opposite directions in the two sexes (Table 6). That is, 67% of genes  
284 differentially expressed by T-treatment in both sexes were differentially expressed in the same direction  
285 (i.e., either higher or lower in T-treated than control individuals in both sexes), more than expected by  
286 chance (Fisher's exact test,  $p < 0.05$ ).

287

288 In the pectoralis, the genes differentially expressed between T-treated and control individuals in both  
289 sexes included 34 that were expressed at a higher level in T-treated individuals than controls in both  
290 sexes, 27 that were expressed at a lower level in T-treated individuals than controls in both sexes, and 7  
291 that were differentially expressed in opposite directions in the two sexes (Table 6). That is, 90% of  
292 genes differentially expressed by T treatment in both sexes were differentially expressed in the same  
293 direction (i.e., either higher or lower in T-treated than control individuals in both sexes), more than  
294 expected by chance (Fisher's exact test,  $p < 0.0001$ ).

## 295 **Discussion**

296 Using a microarray specific to the dark-eyed junco, we identified a large number of genes that were  
297 expressed differentially between males and females, and between T-treated and control individuals of  
298 each sex, in the liver and pectoralis. As predicted, many of the differentially expressed genes were  
299 functionally related to previously described phenotypic effects of T-treatment as well as known sexual  
300 dimorphisms. T-treatment tended to affect different genes in males and females; however, among the  
301 genes differentially expressed by T-treatment in both sexes, T-treatment affected most genes in the

302 same direction in males and females. This suggests that sexually dimorphic transcriptional responses to  
303 T may provide one solution to sexual conflict over circulating levels of T. Not only do these results  
304 provide a detailed view of the molecular mechanisms by which sexual conflict may be resolved, but  
305 they also lay a strong foundation for ecologically-relevant and evolutionarily-significant advances in  
306 our understanding of the mechanisms underlying life-history trade-offs and behavioral evolution in  
307 natural systems, such as the junco. Furthermore, by focusing on the liver and muscle, our findings point  
308 to the mechanisms by which sexual dimorphic peripheral responses to circulating hormones may play a  
309 role in sexual conflict and dimorphism, in addition to previously identified effects in the brain of juncos  
310 (Peterson *et al.*, 2013) and the sex-specific effects previously identified in rats (van Nas *et al.*, 2009;  
311 Yang *et al.*, 2006).

### 312 ***Sexually dimorphic gene expression***

313 Similarly to previous studies on neural tissues in juncos (Peterson *et al.*, 2013) and multiple tissues in  
314 other species (reviewed in Ellegren and Parsch, 2007), we identified many genes that were expressed  
315 differentially between males and females. In the pectoralis, we identified 658 genes that were sexually  
316 dimorphic, and as predicted GO analysis revealed over-representation of terms related to muscle  
317 development, including *muscle system process* and both the *I band* and *A band* portions of the  
318 *sarcomere*. These genes were generally regulated in directions consistent with known sex differences in  
319 body-mass in the junco (Nolan *et al.*, 2002). For example, *titin*, a gene that regulates muscle elasticity  
320 (Itoh-Satoh *et al.*, 2002) is expressed at a higher level in control-males than females in the pectoralis.  
321 *SMAD-related protein 2* was more highly expressed in the pectoralis of control females than control  
322 males consistent with the known role of SMAD proteins in reducing cellular growth (Nakao *et al.*,  
323 1997). Consistent with other studies comparing transcriptional patterns in skeletal muscle of males and  
324 females (Yang *et al.*, 2006; Roth *et al.*, 2002; Welle *et al.*, 2008), we found a large number of genes that  
325 differed in expression between the sexes, including several genes that were directly related to muscle  
326 development and growth.

327 We also identified 291 genes that showed significantly different expression between control males and  
328 control females in the liver, and several of the differentially expressed genes were related to known  
329 phenotypic differences between the sexes. For example, *Lipid phosphate phosphohydrolase 1*, a gene  
330 involved in glycerolipid synthesis and lipid uptake (Kai *et al.*, 1997), was expressed at a higher level in  
331 control males than females, consistent with sex differences in metabolic activity (Fernando *et al.*, 2010;  
332 Wikelski *et al.*, 1999). Further, the GO term *steroid binding* was over-represented among these genes.

333 For example, *hydroxysteroid dehydrogenase like 2 (HSDL2)* was expressed more highly in the liver of  
334 control males than females. *HSDL2* plays a role in sterol binding (Dai *et al.*, 2003), and is marginally  
335 more highly expressed in the liver of females than males in mice (Gatti *et al.*, 2010). This suggests that  
336 the sexes might differ in their metabolism of sterol based compounds in the liver, but that this  
337 difference may vary between taxa.

338 Among genes differentially expressed between control males and control females in the pectoralis were  
339 several transcription factors. In both liver and pectoralis, *transcription factor III B 150 (TFIIB150)*  
340 was more highly expressed in control males than control females. *TFIIB150* mediates transcription via  
341 RNA polymerase III (Schramm *et al.*, 2000), which is primarily involved in the expression of 5S  
342 rRNA, tRNA, and other small RNA's (Dieci *et al.*, 2007). In contrast, *Basic Transcription Factor 3*  
343 (*BTF3*) was expressed more in control females than males in the liver, and *activated RNA polymerase*  
344 *II transcriptional coactivator p15 (P15)* was expressed more in control females than males in the  
345 pectoralis. Both *BTF3* (Zheng *et al.*, 1990) and *P15* (Kretzschmar *et al.*, 1994) activate expression via  
346 RNA polymerase II, which is the primary polymerase for the expression of protein coding genes (Sims  
347 *et al.*, 2004). These findings suggest that males and females may orchestrate gene expression  
348 differently, with males favoring expression of housekeeping type genes that may increase translation  
349 rates, and females favoring expression of protein coding genes. Transcription factors are among the  
350 genes that are differentially expressed by sex in human muscles (Roth *et al.*, 2002), and *BTF3* and *P15*  
351 are differentially expressed by sex in the liver and muscle of mice (Yang *et al.*, 2006). This suggests  
352 that transcription factors in general, and *BTF3* and *P15* in particular, may be involved in sexually  
353 dimorphic patterns of expression in many species.

#### 354 ***Effect of T-treatment in females***

355 Testosterone implants affected female gene expression in both tissues, and the effects were consistent  
356 with known phenotypic effects of T-treatment. For example, *Immunoglobulin A (IgA) heavy chain* had  
357 lower expression in the liver of T-treated females than controls, and *AF411388\_1 basic*, a gene  
358 containing a conserved immunoglobulin region (Yoder *et al.*, 2002), was expressed at a lower level in  
359 the pectoralis of T-treated females than controls. Immunoglobulins play a major role in immune  
360 function (Litman *et al.*, 1993), so their lower expression in T-treated females is consistent with the  
361 known suppressive effect of T-treatment on immune function in female juncos (Zysling *et al.*, 2006).

362 Additionally, the GO term *growth* was over-represented among the genes differentially expressed in the  
363 pectoralis between T-treated and control females. Eleven of the seventeen genes annotated as *growth*  
364 were more highly expressed in T-treated females than controls, and the other six were expressed at a  
365 lower level in T-treated females than controls. Three of the genes that were expressed at a lower level  
366 are known repressors of growth (two representations of *Ankyrin repeat domain-containing protein 26*;  
367 Bera *et al.*, 2008) or transcription (*B-cell CLL/lymphoma 6 (zinc finger protein 51)*; Lemercier *et al.*,  
368 2002). Both higher expression of growth promoting genes and lower expression of growth repressors  
369 are consistent with the role of elevated androgens in increasing muscular growth and maintenance  
370 (Woodward, 1993; Hartgens and Kuipers, 2004).

371 A number of the genes identified as differentially expressed between T-treated and control females  
372 were similar to those identified in studies of other organisms. The GO term *response to hormone*  
373 *stimulus* consists of genes identified as mediators of phenotypic effects of hormones in other species  
374 (Ashburner *et al.*, 2000), and was over represented among differentially expressed genes in female  
375 pectoralis. Among these genes, *Serotonin 1B receptor* was expressed at a higher level in T-treated than  
376 control females. *Serotonin 1B receptor* expression is up-regulated by mineralcorticoids in the aorta of  
377 rats (Banes and Watts, 2002); thus, expression of this serotonin receptor may be mediated indirectly by  
378 T-treatment through changes in other signaling molecules. *Serotonin 1B receptor* has a range of effects  
379 on both behavior and physiology (Donaldson *et al.*, 2013), though its role in skeletal muscle tissue is  
380 unclear. In addition, *carbonic anhydrase II*, a catalyst of the hydrolysis of carbon dioxide (Sterling *et*  
381 *al.*, 2001), was expressed at lower levels in the pectoralis of T-treated females than controls. Expression  
382 of a related gene, *carbonic anhydrase III*, is reduced by strength training in humans (Roth *et al.*, 2002),  
383 suggesting that the action of T-treatment may be related to changes in muscle activity. Expression of  
384 *carbonic anhydrase II* is also reduced by exposure to estrogens in some tissues in rats (Caldarelli *et al.*,  
385 2005), consistent with the view that some of the effects seen in our study may be mediated by  
386 conversion of T to estradiol. We anticipate that many of the genes we have identified play a role in  
387 mediating tissue-level responses to hormones in multiple species, patterns that will become clear in  
388 time.

### 389 ***Effect of T-treatment in males***

390 We identified a large number of genes that were differentially expressed between T-treated and control  
391 males in both liver and pectoralis, and several of them are related to known phenotypic effects of T-  
392 treatment. For example, *heme oxygenase (decyclizing) 1 (HMOX1)* was expressed at lower levels in the

393 liver of T-treated than control males. *HMOX1* is a key enzyme in the breakdown of heme (Platt and  
394 Nath, 1998), and has been implicated in the disruption of human glucose regulation (Bao *et al.*, 2012).  
395 Therefore, *HMOX1*'s lower expression in T-treated males is consistent with previous findings that T  
396 increases metabolism (Oppliger *et al.*, 2004; Fernando *et al.*, 2010), as well as other studies that have  
397 linked heme-related enzymes with activational effects of androgens (van Nas *et al.*, 2009). *Aldehyde*  
398 *oxidase 1 (AOX1)* was also expressed at lower levels in the liver of T-treated males than controls.  
399 Aldehyde oxidases break down a number of metabolically active compounds (Hartmann *et al.*, 2012).  
400 So the lower expression of *AOX1* may indicate that T-treatment reduced catabolism in the liver,  
401 consistent with a previous study showing that castrated mice treated with androgens also showed  
402 significant changes in expression of a variety of metabolic genes in the liver (van Nas *et al.*, 2009).

403 Previous studies in humans (Michael *et al.*, 2005), rats (Wakley *et al.*, 1991) and chickens (Pederson *et*  
404 *al.*, 1999) have demonstrated that higher T reduces bone resorption, though several of the effects may  
405 be related to the conversion of T to estradiol (Oursler *et al.*, 1991). Consistent with these findings, we  
406 observed that *osteoclast inhibitory lectin*, which blocks the formation of bone-resorption osteoclasts  
407 (Hu *et al.*, 2004), was expressed at higher levels in T-treated than control males in both the liver and  
408 pectoralis.

409 Many of the effects of T-treatment that we have identified have the potential to play large, downstream  
410 roles, as evidenced by the over-representation of the GO term *rRNA metabolic process* among genes  
411 differentially expressed in the pectoralis. For example, *Serine/arginine-rich splicing factor 5* modulates  
412 the splice variant selection of many genes (Sebbag-Sznajder *et al.*, 2012) and thus plays a large role in  
413 cellular function. This gene was more highly expressed in both the liver and pectoralis of T-treated than  
414 control males. In the pectoralis, *MGC89063* was more highly expressed in T-treated males than  
415 controls, which is similar to what was found in the hypothalamus and medial amygdala of the junco  
416 (Peterson *et al.*, 2013). *MGC89063* is a transcription factor (Ashburner *et al.*, 2000; Hunter *et al.*,  
417 2009), and the fact that *MGC89063* was more highly expressed in the hypothalamus, medial amygdala,  
418 and pectoralis (but not liver) of T-treated males than controls, and not differentially expressed by T-  
419 treatment in females, raises the possibility that *MGC89063* may play a tissue- and sex-specific role in  
420 mediating the effects of T-treatment via down-stream gene regulation. The specific down-stream  
421 effects of this gene remain unclear, but given its role in multiple target tissues, further investigation into  
422 the pleiotropic roles of *MGC89063* will likely provide novel insights into the integrated response to T-  
423 treatment. Continued focus on non-model organisms like the junco in these future studies may provide  
424 greater insight into the fitness consequences of genes like these.



425 ***Effect of T-treatment in both sexes***

426 Many genes were differentially expressed in the liver and pectoralis between T-treated and control  
427 individuals of *both sexes* (63 genes in liver, and 70 genes in pectoralis). However this number  
428 represents only 5% of the genes differentially expressed by T-treatment in either sex, meaning 95% of  
429 genes that were affected by T were not significantly affected in both sexes. Further, in each tissue over  
430 a quarter of these genes were affected significantly differently in each sex (i.e. had a significant  
431 interaction effect), suggesting that many, though not all, of the genes identified in only one sex are truly  
432 only affected in that sex. This result, especially when combined with similar findings in neural tissue in  
433 juncos (Peterson *et al.*, 2013), lends some support to the hypothesis that T-treatment leads to  
434 transcriptional changes in largely different genes in the two sexes, and suggests a possible remedy to  
435 sexual conflict over T levels. On the other hand, among those genes that were differentially expressed  
436 in both males and females, most (78%) were differentially expressed in the same direction in both  
437 sexes. Collectively, these results suggest that there may be a core transcriptional response to T-  
438 treatment shared between the sexes, but this response is fine-tuned by sex-specific responses, which  
439 may reduce sexual conflict over circulating T levels.

440 Among the genes that were significantly differentially expressed between T-treated and control  
441 individuals in both sexes, several relate to the known effects of T-treatment on activity and metabolism  
442 (Wikelski *et al.*, 1999; Lynn *et al.*, 2000; Buchanan *et al.*, 2001). For example, in the liver and  
443 pectoralis of both sexes, *L-arginine:glycine amidinotransferase* was more highly expressed in T-treated  
444 individuals than controls. This gene encodes the enzyme for the rate-limiting step in creatine  
445 biosynthesis (Humm *et al.*, 1997), which in turn increases energy availability in muscle (Kraemer and  
446 Volek, 1999), and is also regulated by steroid hormones in rodents (Krisko and Walker, 1966).  
447 Therefore, greater expression of *L-arginine:glycine amidinotransferase* in T-treated individuals is  
448 consistent with steroid-induced increases in activity levels and metabolic rate. Similarly, 3-  
449 *hydroxybutyrate dehydrogenase (3HBDH)* was expressed at a higher level in T-treated individuals in  
450 both sexes and both tissues. *3HBDH* catalyzes the reversible reaction between beta-hydroxybutyric  
451 acid and acetoacetate, a key step in the breakdown of fatty acids for energy (Bergmeyer *et al.*, 1967;  
452 Williamson *et al.*, 1962). Both male and female rats respond to androgen treatment with changes in the  
453 expression of fatty acid metabolizing genes as well (van Nas *et al.*, 2009). Together, the changes in the  
454 expression of these genes could be a major contributor to T-induced shifts in metabolism and activity in  
455 juncos (Chandler *et al.*, 1994; Lynn *et al.*, 2000) and other species (Wikelski *et al.*, 1999; Marler *et al.*,  
456 1995). However, it remains possible that these changes in gene expression are indirect effects of T-

457 treatment, e.g. if T affects metabolism or activity via other routes and these genes respond in kind to  
458 altered metabolism or activity.

459 Several genes related to insulin signaling were differentially expressed between T-treated and control  
460 individuals of both sexes in the liver. *Insulin receptor substrate 4 (IRS4)*, for example, was expressed  
461 more highly in the livers of T-treated individuals than controls in both sexes. *IRS4* mediates the activity  
462 of a number of growth factors (e.g. Hinsby *et al.*, 2004), and lack of *IRS4* leads to a decrease in body  
463 size in knockout mice (Fantin *et al.*, 2000). Therefore, higher expression of *IRS4* in the liver of T-  
464 treated individuals than controls may mediate some of the previously reported metabolic and growth  
465 effects of T-treatment (Cox *et al.*, 2009; Wikelski *et al.*, 1999; Lynn *et al.*, 2000). In addition, *insulin-*  
466 *like growth factor 2 receptor* was more highly expressed in the liver of T-treated females than controls,  
467 and *insulin-like growth factor 1* was expressed at lower levels in the liver of T-treated males than  
468 controls. However, neither gene had a significant sex-by-treatment interaction term, suggesting that  
469 both genes may also have been regulated in the opposite sex, but below our limits of detection. Insulin  
470 like growth factors also mediate growth (Abuzzahab *et al.*, 2003; Petry *et al.*, 2005) and have been  
471 implicated in the expression of sexually selected traits (Emlen *et al.*, 2012), some of which are also  
472 mediated by androgens (Folstad and Karter, 1992).

473 Several genes related to the regulation of growth were differentially expressed in liver between T-  
474 treated and control individuals of each sex, though some of the specific genes affected by T-treatment  
475 differed between males and females. *Follistatin* was more highly expressed in the liver of T-treated  
476 individuals than controls in both sexes. *Follistatin* binds and inactivates members of the TGF-beta  
477 super family, including myostatin, such that increased *follistatin* is associated with increased muscle  
478 growth (Lee and McPherron, 2001). Further, *epidermal growth factor receptor (EGFR)* was more  
479 highly expressed in the liver of T-treated than control females and had a marginally significant sex-by-  
480 treatment interaction term (uncorrected  $p = 0.04$ ), suggesting some sex-specific hormone regulation.  
481 Likewise, *opioid growth factor receptor (OGFr)* was less expressed in the liver of T-treated than  
482 control males and also had a significant sex-by-treatment interaction term. *EGFR* acts to increase cell  
483 proliferation and growth (Oda *et al.*, 2005), but *OGFr* acts to reduce growth (Zagon *et al.*, 2008). In  
484 human men, similar changes in the expression of growth-related genes, including *OGFr*, are observed  
485 in response to hormone manipulation, and the changes are believed to be related to lean muscle mass  
486 growth (Montano *et al.*, 2007). Thus, the expression changes seen in both male and female juncos are  
487 related to increased growth, but potentially via different transcriptional mechanisms.

488 **Summary**

489 In this study, we applied genomic tools to the dark-eyed junco, in order to identify ecologically relevant  
490 sex differences in gene expression and transcriptional responses to experimentally elevated  
491 testosterone. As predicted, many of the specific genes affected were associated with known  
492 physiological and metabolic effects of T-treatment, but the expression response to T-treatment was  
493 different in the two sexes: only 5% of regulated genes overlap in the two sexes. Interestingly, among  
494 genes that were differentially expressed between T-treated and control individuals in both sexes, most  
495 were differentially expressed in the same direction. Therefore, testosterone may be utilizing a shared  
496 core set of transcriptional paths in both sexes that are complemented and modified by sex specific  
497 transcriptional responses. Characterizing these effects in the periphery is particularly notable in light of  
498 the prevailing view in behavioral neuroendocrinology that many sex differences are mediated at the  
499 level of the brain. Our results detail some of the molecular mechanisms by which hormones have sex-  
500 specific activational effects in two important peripheral tissues. Whether these sex-specific mechanisms  
501 represent adaptive mechanistic responses to T is an open question that can be addressed by continued  
502 focus on natural species like the junco.

503 **Acknowledgments**

504 The authors would like to thank Sarah Wanamaker for assistance with animal care, Baiju Parikh, at  
505 Roche NimbleGen for contributions to the CGB Ecological Genomics Pipeline, and Mountain Lake  
506 Biological Station, University of Virginia for facilities and access to property for conducting this  
507 research.

508 **Funding**

509 This material is based upon work supported by the National Science Foundation [ACI-0338618], CNS-  
510 0521433, ABI-1062432, OCI-0451237, OCI-0535258, and OCI-0504075, IOS-0820055 and DGE-  
511 0504627]; the National Institutes of Health [T32-HD049336]; and the Indiana METACyt Initiative. The  
512 Indiana METACyt Initiative of Indiana University is supported in part by Lilly Endowment, Inc. This  
513 work was supported in part by Shared University Research grants from IBM, Inc. to Indiana University.

514 **Author Contributions**

515 MPP, KAR, JHC, HT, JKC, and EDK contributed to the conception and design of the project. MPP,  
516 KAR, CAT, JAL, JHC, and CZ performed data collection or analysis. All authors contributed to the  
517 interpretation of results and the editing of the manuscript.

518

519 **Figures**

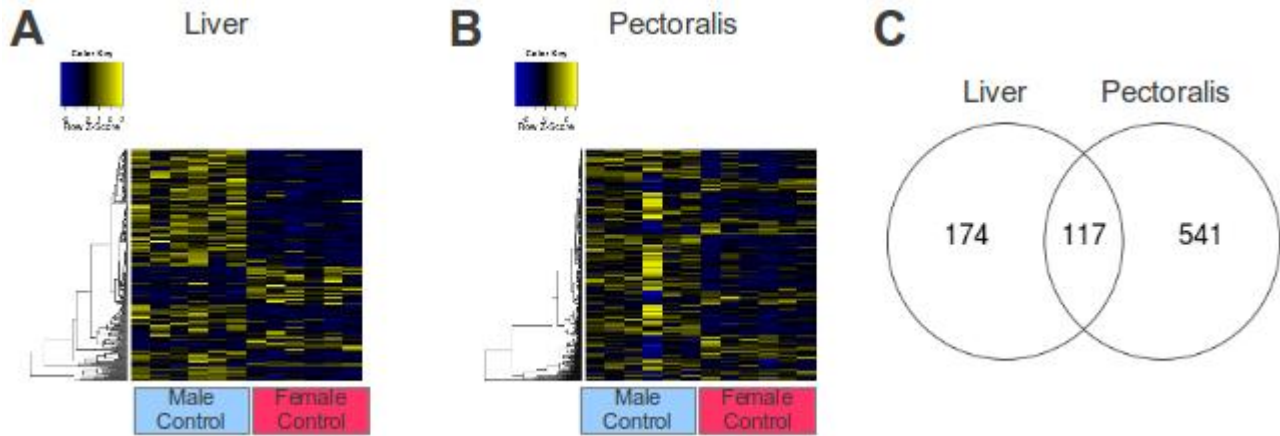

520

521 **Figure 1. Sex differences in gene expression.** Differences in gene expression between the sexes are  
522 represented by heat maps that show scaled individual expression scores for significantly differentially  
523 expressed genes in the liver (a) and pectoralis (b). Venn diagram shows the overlap in significant genes  
524 between the two tissues (c). Each column represents an individual, and each row a gene. Yellow  
525 represents high gene expression, blue represents low expression scaled to the levels of expression for  
526 each gene.

527

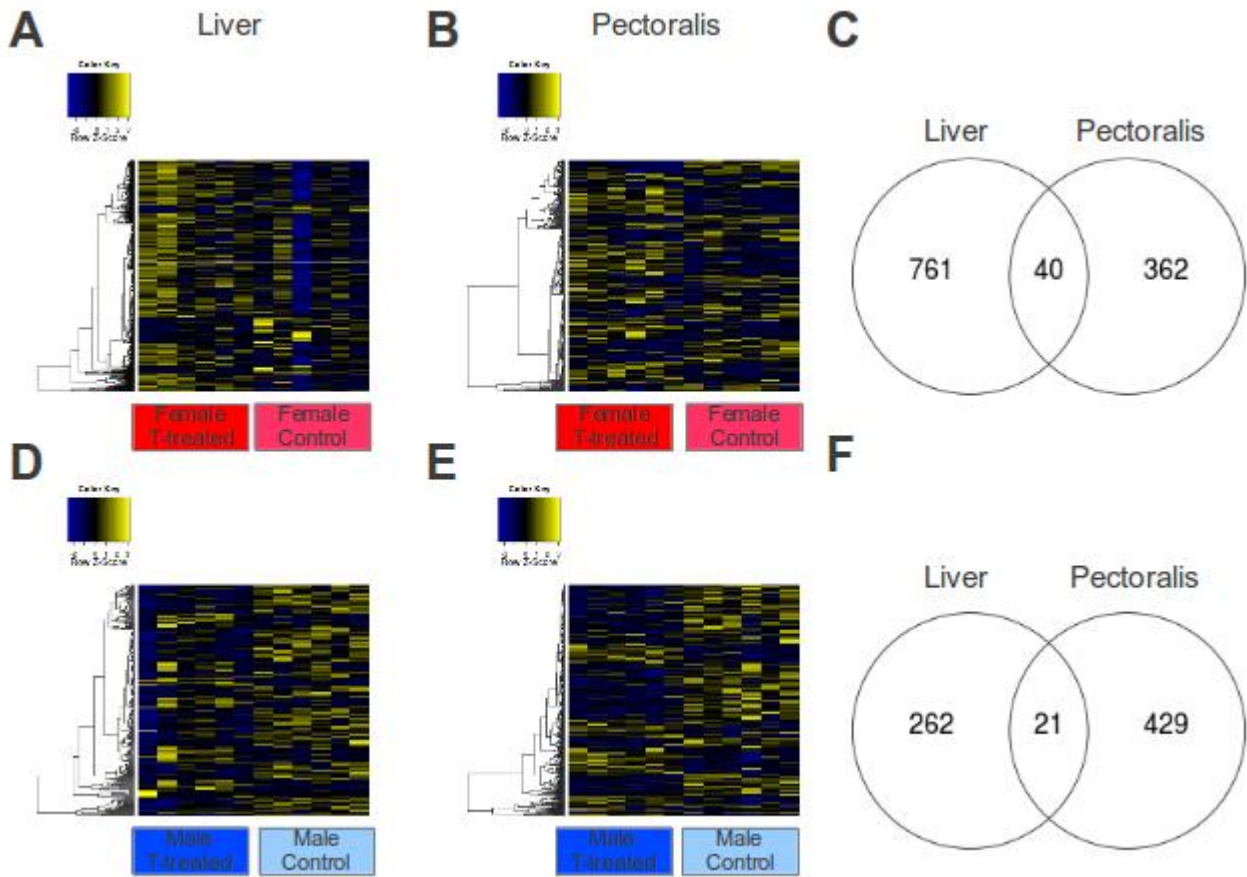

528

529 **Figure 2. Gene expression in response to T-treatment in each sex.** Differences in gene expression  
 530 between T-treated and control individuals in both the liver (left column) and the pectoralis (middle  
 531 column) in females (a-c) and in males (d-f). Heat maps show scaled individual expression scores for  
 532 genes that were significantly differentially expressed between T-treated and control individuals in each  
 533 sex (a,b,d,e). Venn diagrams (c,f) show the overlap of significant genes within each contrast between  
 534 the tissues. See text and supplementary tables for more information. Each column represents and  
 535 individual, and each row a gene. Yellow represents high gene expression, and blue represents low  
 536 expression scaled to the levels of expression for each gene.

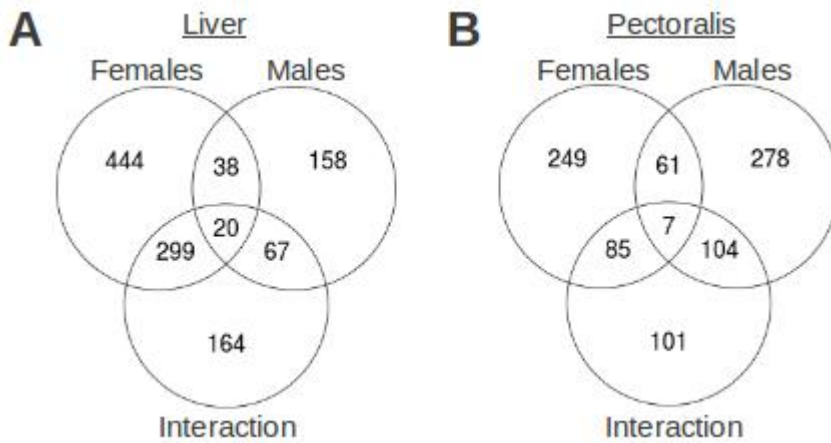

537

538

539 **Figure 3. Comparing the effect of T-treatment in males and females.** Venn diagrams for (A) liver  
 540 and (B) Pectoralis showing the number of genes significantly differentially expressed between T-treated  
 541 and control individuals in males and females, and those with a significant sex-by-treatment interaction  
 542 effect.

543

544 **Table 1. GO terms over-represented among genes differentially expressed in the liver between**  
 545 **males and females.**

| GO ID      | GO Description                                          | Annotated Genes Expressed | Number Significantly DE | P value |
|------------|---------------------------------------------------------|---------------------------|-------------------------|---------|
| GO:0002440 | production of molecular mediator of immune response     | 26                        | 4                       | 0.0047  |
| GO:0006672 | ceramide metabolic process                              | 7                         | 3                       | 0.0005  |
| GO:0006892 | post-Golgi vesicle-mediated transport                   | 15                        | 3                       | 0.0059  |
| GO:0007033 | vacuole organization                                    | 28                        | 5                       | 0.0006  |
| GO:0009206 | purine ribonucleoside triphosphate biosynthetic process | 33                        | 4                       | 0.0093  |
| GO:0044419 | interspecies interaction between organisms              | 19                        | 4                       | 0.0038  |
| GO:0046519 | sphingoid metabolic process                             | 14                        | 3                       | 0.0048  |
| GO:0051259 | protein oligomerization                                 | 111                       | 8                       | 0.0071  |
| GO:0005496 | steroid binding                                         | 17                        | 3                       | 0.0071  |

546



547 **Table 2. GO terms over-represented among genes differentially expressed in the pectoralis**  
 548 **between males and females.**

| GO ID      | GO Description                              | Annotated Genes Expressed | Number Significantly DE | P value |
|------------|---------------------------------------------|---------------------------|-------------------------|---------|
| GO:0000018 | regulation of DNA recombination             | 9                         | 4                       | 0.0009  |
| GO:0003007 | heart morphogenesis                         | 45                        | 12                      | 0.0000  |
| GO:0007033 | vacuole organization                        | 24                        | 7                       | 0.0002  |
| GO:0009306 | protein secretion                           | 16                        | 4                       | 0.0095  |
| GO:0014866 | skeletal myofibril assembly                 | 15                        | 9                       | 0.0000  |
| GO:0031929 | TOR signaling cascade                       | 9                         | 3                       | 0.0106  |
| GO:0048585 | negative regulation of response to stimulus | 13                        | 4                       | 0.0042  |
| GO:0048738 | cardiac muscle tissue development           | 23                        | 11                      | 0.0000  |
| GO:0051046 | regulation of secretion                     | 27                        | 5                       | 0.0105  |
| GO:0051095 | regulation of helicase activity             | 5                         | 3                       | 0.0015  |
| GO:0051899 | membrane depolarization                     | 6                         | 3                       | 0.0029  |
| GO:0004866 | endopeptidase inhibitor activity            | 31                        | 6                       | 0.0057  |
| GO:0004896 | cytokine receptor activity                  | 5                         | 3                       | 0.0015  |
| GO:0032135 | DNA insertion or deletion binding           | 5                         | 3                       | 0.0015  |
| GO:0030017 | sarcomere                                   | 92                        | 17                      | 0.0027  |
| GO:0031672 | A band                                      | 23                        | 9                       | 0.0000  |
| GO:0031674 | I band                                      | 62                        | 12                      | 0.0001  |
| GO:0032300 | mismatch repair complex                     | 5                         | 3                       | 0.0013  |

549

550 **Table 3. GO terms over-represented among genes differentially expressed in the liver between T-**  
 551 **treated and control females.**

| GO ID      | GO Description                        | Annotated Genes Expressed | Number Significantly DE | P value |
|------------|---------------------------------------|---------------------------|-------------------------|---------|
| GO:0000087 | M phase of mitotic cell cycle         | 144                       | 19                      | 0.0048  |
| GO:0001707 | mesoderm formation                    | 5                         | 3                       | 0.0033  |
| GO:0001708 | cell fate specification               | 5                         | 3                       | 0.0033  |
| GO:0006275 | regulation of DNA replication         | 7                         | 3                       | 0.0102  |
| GO:0006874 | cellular calcium ion homeostasis      | 47                        | 9                       | 0.0075  |
| GO:0006892 | post-Golgi vesicle-mediated transport | 15                        | 5                       | 0.0030  |

| GO ID      | GO Description                                                                                                                                                                              | Annotated Genes Expressed | Number Significantly DE | P value |
|------------|---------------------------------------------------------------------------------------------------------------------------------------------------------------------------------------------|---------------------------|-------------------------|---------|
| GO:0006999 | nuclear pore organization                                                                                                                                                                   | 5                         | 3                       | 0.0033  |
| GO:0008105 | asymmetric protein localization                                                                                                                                                             | 11                        | 4                       | 0.0057  |
| GO:0009057 | macromolecule catabolic process                                                                                                                                                             | 271                       | 38                      | 0.0014  |
| GO:0010518 | positive regulation of phospholipase activity                                                                                                                                               | 9                         | 4                       | 0.0024  |
| GO:0016197 | endosomal transport                                                                                                                                                                         | 27                        | 6                       | 0.0105  |
| GO:0016477 | cell migration                                                                                                                                                                              | 172                       | 22                      | 0.0077  |
| GO:0019751 | polyol metabolic process                                                                                                                                                                    | 24                        | 7                       | 0.0011  |
| GO:0035195 | gene silencing by miRNA                                                                                                                                                                     | 12                        | 4                       | 0.0080  |
| GO:0043171 | peptide catabolic process                                                                                                                                                                   | 6                         | 3                       | 0.0062  |
| GO:0051603 | proteolysis involved in cellular protein catabolic process                                                                                                                                  | 184                       | 24                      | 0.0006  |
| GO:0005275 | amine transmembrane transporter activity                                                                                                                                                    | 25                        | 7                       | 0.0015  |
| GO:0008017 | microtubule binding                                                                                                                                                                         | 13                        | 5                       | 0.0015  |
| GO:0016712 | oxidoreductase activity, acting on paired donors, with incorporation or reduction of molecular oxygen, reduced flavin or flavoprotein as one donor, and incorporation of one atom of oxygen | 6                         | 3                       | 0.0064  |
| GO:0016769 | transferase activity, transferring nitrogenous groups                                                                                                                                       | 16                        | 5                       | 0.0044  |
| GO:0016790 | thiolester hydrolase activity                                                                                                                                                               | 53                        | 11                      | 0.0012  |
| GO:0019787 | small conjugating protein ligase activity                                                                                                                                                   | 135                       | 22                      | 0.0002  |
| GO:0042562 | hormone binding                                                                                                                                                                             | 10                        | 4                       | 0.0040  |
| GO:0005874 | microtubule                                                                                                                                                                                 | 18                        | 6                       | 0.0011  |
| GO:0009925 | basal plasma membrane                                                                                                                                                                       | 9                         | 4                       | 0.0024  |
| GO:0031231 | intrinsic to peroxisomal membrane                                                                                                                                                           | 6                         | 3                       | 0.0061  |

552

553 **Table 4. GO terms over-represented among genes differentially expressed in the pectoralis**554 **between T-treated and control females.**

| GO ID      | GO Description                 | Annotated Genes Expressed | Number Significantly DE | P value |
|------------|--------------------------------|---------------------------|-------------------------|---------|
| GO:0006665 | sphingolipid metabolic process | 28                        | 4                       | 0.0109  |
| GO:0008406 | gonad development              | 27                        | 5                       | 0.0014  |
| GO:0010038 | response to metal ion          | 94                        | 8                       | 0.0093  |

| <b>GO ID</b> | <b>GO Description</b>                           | <b>Annotated Genes Expressed</b> | <b>Number Significantly DE</b> | <b>P value</b> |
|--------------|-------------------------------------------------|----------------------------------|--------------------------------|----------------|
| GO:0035265   | organ growth                                    | 10                               | 3                              | 0.0032         |
| GO:0048511   | rhythmic process                                | 29                               | 4                              | 0.0123         |
| GO:0048545   | response to steroid hormone stimulus            | 89                               | 8                              | 0.0067         |
| GO:0055088   | lipid homeostasis                               | 14                               | 3                              | 0.0087         |
| GO:0004091   | carboxylesterase activity                       | 23                               | 4                              | 0.0044         |
| GO:0005267   | potassium channel activity                      | 17                               | 5                              | 0.0001         |
| GO:0008017   | microtubule binding                             | 15                               | 3                              | 0.0091         |
| GO:0015179   | L-amino acid transmembrane transporter activity | 5                                | 3                              | 0.0003         |
| GO:0016298   | lipase activity                                 | 26                               | 5                              | 0.0009         |
| GO:0005874   | microtubule                                     | 17                               | 3                              | 0.0117         |
| GO:0005887   | integral to plasma membrane                     | 48                               | 5                              | 0.0115         |
| GO:0009925   | basal plasma membrane                           | 12                               | 3                              | 0.0042         |
| GO:0031012   | extracellular matrix                            | 84                               | 10                             | 0.0005         |
| GO:0031461   | cullin-RING ubiquitin ligase complex            | 20                               | 4                              | 0.0022         |

555

556 **Table 5. GO terms over-represented among genes differentially expressed in the pectoralis**557 **between T-treated and control males.**

| <b>GO ID</b> | <b>GO Description</b>                           | <b>Annotated Genes Expressed</b> | <b>Number Significantly DE</b> | <b>P value</b> |
|--------------|-------------------------------------------------|----------------------------------|--------------------------------|----------------|
| GO:0009066   | aspartate family amino acid metabolic process   | 11                               | 3                              | 0.0044         |
| GO:0009895   | negative regulation of catabolic process        | 11                               | 3                              | 0.0044         |
| GO:0016072   | rRNA metabolic process                          | 13                               | 3                              | 0.0072         |
| GO:0022904   | respiratory electron transport chain            | 29                               | 5                              | 0.0020         |
| GO:0030301   | cholesterol transport                           | 13                               | 3                              | 0.0072         |
| GO:0005342   | organic acid transmembrane transporter activity | 23                               | 4                              | 0.0050         |
| GO:0016829   | lyase activity                                  | 72                               | 8                              | 0.0016         |
| GO:0048037   | cofactor binding                                | 63                               | 7                              | 0.0032         |

558

559 **Table 6. Comparing gene expression in response to T-treatment in males and females.** Genes that  
 560 were significantly differentially expressed between T-treated and control individuals in both sexes  
 561 within liver or pectoralis. These genes represent less than 10% of the genes differentially expressed in  
 562 at least one sex. See text and supplementary tables for more information.

| Liver                                  |                                         |                                          | Pectoralis                             |                                         |                                          |
|----------------------------------------|-----------------------------------------|------------------------------------------|----------------------------------------|-----------------------------------------|------------------------------------------|
|                                        | Lower in T-treated than control females | Higher in T-treated than control females |                                        | Lower in T-treated than control females | Higher in T-treated than control females |
| Higher in T-treated than control males | 9                                       | 28                                       | Higher in T-treated than control males | 5                                       | 34                                       |
| Lower in T-treated than control males  | 11                                      | 10                                       | Lower in T-treated than control males  | 27                                      | 2                                        |

563

564

565 **Supplementary Materials**

566 **Supplementary Figure 1. Hybridization design for microarray experiments.**

567 **Supplementary Table 1. Genes significantly differentially expressed.**

568

569 **References**

- Abuzzahab MJ, Schneider A, Goddard A, Grigorescu F, Lautier C, Keller E, Kiess W, Klammt J, Kratzsch J, Osgood D, Pfaffle R, Raile K, Seidel B, Smith RJ, Chernausek SD, Frank GR, Kaplowitz PB, Pescovitz OH, Smith EP.** (2003). IGF-I receptor mutations resulting in intrauterine and postnatal growth retardation. *New England Journal of Medicine*. **349**:23. 2211-2222.
- Alexa A, Rahnenfuehrer J, Lengauer T.** (2006). Improved scoring of functional groups from gene expression data by decorrelating GO graph structure. *Bioinformatics*. **22**:13. 1600-1607.
- Alexa A, Rahnenfuehrer J.** (2010). topGO: Enrichment analysis for Gene Ontology.
- Arnold AM, Peralta JM, Thonney ML.** (1997). Effect of testosterone on differential muscle growth and on protein and nucleic acid concentrations in muscles of growing lambs. *J Anim Sci*. **75**:6. 1495-1503.
- Arnold AP.** (1975). Effects of castration and androgen replacement on song, courtship, and aggression in zebra finches (*Poephila-guttata*). *Journal of Experimental Zoology*. **191**:3. 309-325.
- Ashburner M, Ball CA, Blake JA, Botstein D, Butler H, Cherry JM, Davis AP, Dolinski K,**

- Dwight SS, Eppig JT, Harris MA, Hill DP, Issel-Tarver L, Kasarskis A, Lewis S, Matese JC, Richardson JE, Ringwald M, Rubin GM, Sherlock G, Gene Ontology Consortium.** (2000). Gene Ontology: tool for the unification of biology. *Nat Genet.* **25**:1. 25-29.
- Banes AKL, Watts SW.** (2002). Upregulation of arterial serotonin 1B and 2B receptors in deoxycorticosterone acetate-salt hypertension. *Hypertension.* **39**:2. Amer Heart Assoc Council High Blood Pressure Res-398.
- Bao W, Rong S, Zhang M, Yu X, Zhao Y, Xiao X, Yang W, Wang D, Yao P, Hu FB, Liu L.** (2012). Plasma Heme Oxygenase-1 Concentration in Relation to Impaired Glucose Regulation in a Non-Diabetic Chinese Population. *PLoS ONE.* **7**:3.
- Baur L, Nasipak B, Kelley D.** (2008). Sexually differentiated, androgen-regulated, larynx-specific myosin heavy-chain isoforms in *Xenopus tropicalis*; comparison to *Xenopus laevis*. *Dev Genes Evol.* **218**:7. 371-379.
- Benjamini Y, Hochberg Y.** (1995). Controlling the false discovery rate - a practical and powerful approach to multiple testing. *Journal of the Royal Statistical Society Series B-Methodological.* **57**:1. 289-300.
- Bera TK, Liu XF, Yamada M, Gavrilovat O, Mezey E, Tessarollo L, Anver M, Hahn Y, Lee B, Pastan I.** (2008). A model for obesity and gigantism due to disruption of the *Ankrd26* gene. *Proc Natl Acad Sci U S A.* **105**:1. 270-275.
- Berg E, Maklakov A.** (2012). Sexes suffer from suboptimal lifespan because of genetic conflict in a seed beetle. *Proceedings of the Royal Society B - Biology.* **279**:1745. 4296-4302.
- Bergmeyer HU, Gawehn K, Klotzsch H, Krebs HA, Williams DH.** (1967). Purification and properties of crystalline 3-hydroxybutyrate dehydrogenase from *Rhodospseudomonas spheroides*. *Biochem J.* **102**:2. 423.
- Bonduriansky R, Chenoweth SF.** (2009). Intralocus sexual conflict. *Trends in Ecology & Evolution.* **24**:5. 280-288.
- Boratynski Z, Koskela E, Mappes T, Oksanen TA.** (2010). Sex-specific selection on energy metabolism - selection coefficients for winter survival. *J Evol Biol.* **23**:9. 1969-1978.
- Buchanan KL, Evans MR, Goldsmith AR, Bryant DM, Rowe LV.** (2001). Testosterone influences basal metabolic rate in male house sparrows: a new cost of dominance signalling? *Proceedings of the Royal Society of London Series B-Biological Sciences.* **268**:1474. 1337-1344.
- Caldarelli A, Diel P, Vollmer G.** (2005). Effect of phytoestrogens on gene expression of carbonic anhydrase II in rat uterus and liver. *J Steroid Biochem.* **97**:3. 251-256.
- Casto JM, Nolan V, Ketterson ED.** (2001). Steroid hormones and immune function: Experimental studies in wild and captive dark-eyed juncos (*Junco hyemalis*). *American Naturalist.* **157**:4. 408-420.
- Chandler CR, Ketterson ED, Nolan V, Ziegenfus C.** (1994). Effects of testosterone on spatial activity in free-ranging male dark-eyed junco, *Junco hyemalis*. *Animal Behavior.* **47**:6. 1445-1455.
- Chapman T, Arnqvist G, Bangham J, Rowe L.** (2003). Sexual conflict. *Trends in Ecology and Evolution.* **18**:1. 41-47.
- Cheviron ZA, Carling MD, Brumfield RT.** (2011). Effects of postmortem interval and preservation method on RNA isolated from field-preserved avian tissues. *Condor.* **113**:3. 483-489.
- Clotfelter ED, O'Neal DM, Gaudioso JM, Casto JM, Parker-Renga IM, Snajdr EA, Duffy DL, Nolan V, Ketterson ED.** (2004). Consequences of elevating plasma testosterone in females of a socially monogamous songbird: evidence of constraints on male evolution? *Horm Behav.* **46**:2. 171-178.
- Corton JC, Bushel PR, Fostel J, O'Lone RB.** (2012). Sources of variance in baseline gene expression in the rodent liver. *Mutation Research-Genetic Toxicology And Environmental Mutagenesis.* **746**:2. 104-112.
- Cox R, Calsbeek R.** (2009). Sexually Antagonistic Selection, Sexual Dimorphism, and the Resolution

of Intralocus Sexual Conflict. *American Naturalist*. **173**:2. 176-187.

- Cox R, Stenquist D, Calsbeek R.** (2009). Testosterone, growth and the evolution of sexual size dimorphism. *J Evol Biol*. **22**:8. 1586-1598.
- Dai JF, Xie Y, Wu QH, Wang L, Yin G, Ye X, Zeng L, Xu J, Ji CN, Gu SH, Huang QS, Zhao RCH, Mao YM.** (2003). Molecular cloning and characterization of a novel human hydroxysteroid dehydrogenase-like 2 (HSDL2) cDNA from fetal brain. *Biochem Genet*. **41**:5-6. 165-174.
- Delic D, Grosser C, Dkhil M, Al-Quraishy S, Wunderlich F.** (2010). Testosterone-induced upregulation of miRNAs in the female mouse liver. *Steroids*. **75**:12.
- Dieci G, Fiorino G, Castelnovo M, Teichmann M, Pagano A.** (2007). The expanding RNA polymerase III transcriptome. *Trends Genet*. **23**:12. 614-622.
- Diodato MD, Knoferl MW, Schwacha MG, Bland KI, Chaudry IH.** (2001). Gender differences in the inflammatory response and survival following haemorrhage and subsequent sepsis. *Cytokine*. **14**:3. 162-169.
- Donaldson ZR, Nautiyal KM, Ahmari SE, Hen R.** (2013). Genetic approaches for understanding the role of serotonin receptors in mood and behavior. *Curr Opin Neurobiol*. **23**:3. 399-406.
- Ellegren H, Parsch J.** (2007). The evolution of sex-biased genes and sex-biased gene expression. *Nature Reviews Genetics*. **8**:9. 689-698.
- Emlen DJ, Warren IA, Johns A, Dworkin I, Lavine LC.** (2012). A mechanism of extreme growth and reliable signaling in sexually selected ornaments and weapons. *Science (80- )*. **337**:6096. 860-864.
- Fantin VR, Wang Q, Lienhard GE, Keller SR.** (2000). Mice lacking insulin receptor substrate 4 exhibit mild defects in growth, reproduction, and glucose homeostasis. *American Journal of Physiology-Endocrinology and Metabolism*. **278**:1. E127-E133.
- Feng NY, Katz A, Day LB, Barske J, Schlinger BA.** (2010). Limb Muscles Are Androgen Targets in an Acrobatic Tropical Bird. *Endocrinology*. **151**. 0000-0000.
- Fernando SM, Rao PC, Niel L, Chatterjee D, Stagljar M, Monks DA.** (2010). Myocyte Androgen Receptors Increase Metabolic Rate and Improve Body Composition by Reducing Fat Mass. *Endocrinology*. **151**:7. 3125-3132.
- Folstad I, Karter AJ.** (1992). Parasites, bright males, and the immunocompetence handicap. *Am Nat*. **139**:3. 603-622.
- Fuxjager MJ, Barske J, Du S, Day LB, Schlinger BA.** (2012). Androgens Regulate Gene Expression in Avian Skeletal Muscles. *PLoS ONE*. **7**:12. e51482.
- Gatti DM, Zhao N, Chesler EJ, Bradford BU, Shabalin AA, Yordanova R, Lu L, Rusyn I.** (2010). Sex-specific gene expression in the BXD mouse liver. *Physiol Genomics*. **42**:3. 456-468.
- Gerlach NM, Ketterson ED.** (2013). Experimental elevation of testosterone lowers fitness in female dark-eyed juncos. *Horm Behav*. **63**:5. 782-790.
- Hartgens F, Kuipers H.** (2004). Effects of androgenic-anabolic steroids in athletes. *Sports Med*. **34**:8. 513-554.
- Hartmann T, Terao M, Garattini E, Teutloff C, Alfaro JF, Jones JP, Leimkuehler S.** (2012). The Impact of Single Nucleotide Polymorphisms on Human Aldehyde Oxidase. *Drug Metabolism and Disposition*. **40**:5. 856-864.
- Herbst KL, Bhasin S.** (2004). Testosterone action on skeletal muscle. *Current Opinion in Clinical Nutrition & Metabolic Care*. **7**:3. 271-277.
- Heubi JA** (1993). Liver and Biliary Systems. In *Physiology*. (Ed. Sperelakis N, Banks RO). pp. 631-644. Little, Brown and Company.
- Hinsby AM, Olsen JV, Mann M.** (2004). Tyrosine phosphoproteomics of fibroblast growth factor signaling - A role for insulin receptor substrate-4. *Journal of Biological Chemistry*. **279**:45. 46438-46447.
- Hu YS, Zhou H, Myers D, Quinn JMW, Atkins GJ, Ly C, Gange C, Kartsogiannis V, Elliott J,**



- Kostakis P, Zannettino ACW, Cromer B, McKinstry WJ, Findlay DM, Gillespie MT, Ng KW.** (2004). Isolation of a human homolog of osteoclast inhibitory lectin that inhibits the formation and function of osteoclasts. *Journal of Bone and Mineral Research*. **19**:1. 89-99.
- Humm A, Fritsche E, Steinbacher S, Huber R.** (1997). Crystal structure and mechanism of human L-arginine:glycine amidinotransferase: A mitochondrial enzyme involved in creatine biosynthesis. *EMBO Journal*. **16**:12. 3373-3385.
- Hunter S, Apweiler R, Attwood TK, Bairoch A, Bateman A, Binns D, Bork P, Das U, Daugherty L, Duquenne L, Finn RD, Gough J, Haft D, Hulo N, Kahn D, Kelly E, Laugraud A, Letunic I, Lonsdale D, Lopez R, Madera M, Maslen J, McAnulla C, McDowall J, Mistry J, Mitchell A, Mulder N, Natale D, Orengo C, Quinn AF, Selengut JD, Sigrist CJA, Thimma M, Thomas PD, Valentin F, Wilson D, Wu CH, Yeats C.** (2009). InterPro: the integrative protein signature database. *Nucleic Acids Res*. **37**. D211-D215.
- Itoh-Satoh M, Hayashi T, Nishi H, Koga Y, Arimura T, Koyanagi T, Takahashi M, Hohda S, Ueda K, Nouchi T, Hiroe M, Marumo F, Imaizumi T, Yasunami M, Kimura A.** (2002). Titin mutations as the molecular basis for dilated cardiomyopathy. *Biochem Biophys Res Commun*. **291**:2. 385-393.
- Kai M, Wada I, Imai S, Sakane F, Kanoh H.** (1997). Cloning and characterization of two human isozymes of Mg<sup>2+</sup>-independent phosphatidic acid phosphatase. *Journal of Biological Chemistry*. **272**:39. 24572-24578.
- Ketterson E, Atwell J, McGlothlin J.** (2009). Phenotypic integration and independence: Hormones, performance, and response to environmental change. *Integr Comp Biol*. **49**:4. 365-379.
- Ketterson E, Nolan V, Wolf L, Ziegenfus C, Dufty A, Ball G, Johnsen T.** (1991). Testosterone and avian life histories - the effect of experimentally elevated testosterone on corticosterone and body-mass in dark-eyed juncos. *Horm Behav*. **25**:4. 489-503.
- Ketterson ED, Nolan V, Cawthorn MJ, Parker PG, Ziegenfus C.** (1996). Phenotypic engineering: Using hormones to explore the mechanistic and functional bases of phenotypic variation in nature. *Ibis*. **138**:1. 70-86.
- Ketterson ED, Nolan V, Sandell M.** (2005). Testosterone in females: Mediator of adaptive traits, constraint on sexual dimorphism, or both? *American Naturalist*. **166**:4. S85-S98.
- Ketterson ED, Nolan V, Wolf L, Ziegenfus C.** (1992). Testosterone and avian life histories - effects of experimentally elevated testosterone on behavior and correlates of fitness in the dark-eyed junco (*Junco hyemalis*). *American Naturalist*. **140**:6. 980-999.
- Kraemer WJ, Volek JS.** (1999). Creatine supplementation - Its role in human performance. *Clin Sports Med*. **18**:3. 651-+.
- Kretzschmar M, Kaiser K, Lottspeich F, Meisterernst M.** (1994). A novel mediator of class-II gene-transcription with homology to viral Immediate-early transcriptional regulators. *Cell*. **78**:3. 525-534.
- Krisiko I, Walker JB.** (1966). Influence of sex hormones of amidinotransferase levels. Metabolic Control of creatine biosynthesis. *Acta Endocrinol (Copenh)*. **53**:4. 655-&.
- Labrie F, Luu-The V, Calvo E, Martel C, Cloutier J, Gauthier S, Belleau P, Morissette J, Levesque MH, Labrie C.** (2005). Tetrahydrogestrinone induces a genomic signature typical of a potent anabolic steroid. *J Endocrinol*. **184**:2. 427-433.
- Lee SJ, McPherron AC.** (2001). Regulation of myostatin activity and muscle growth. *Proc Natl Acad Sci U S A*. **98**:16. 9306-9311.
- Lemercier C, Brocard MP, Puvion-Dutilleul F, Kao HY, Albagli O, Khochbin S.** (2002). Class II histone deacetylases are directly recruited by BCL6 transcriptional repressor. *Journal of Biological Chemistry*. **277**:24. 22045-22052.
- Linnaeus C** (1758). *Fringilla hyemalis*. In *Systema naturae per regna tria naturae, secundum classes, ordines, genera, species, cum characteribus, differentiis, synonymis, locis* (10th ed., vol.1): 183.

(Ed. ). pp. 98.30. Laurentius Salvius, Holmius.

- Litman GW, Rast JP, Shablott MJ, Haire RN, Hulst M, Roess W, Litman RT, Hindsfrey LR, Zilch A, Amemiya CT.** (1993). Phylogenetic diversification of immunoglobulin genes and the antibody repertoire. *Mol Biol Evol.* **10**:1. 60-72.
- Liu D, Sartor MA, Nader GA, Gutmann L, Treutelaar MK, Pistilli EE, IglayRager HB, Burant CF, Hoffman EP, Gordon PM.** (2010). Skeletal muscle gene expression in response to resistance exercise: sex specific regulation. *BMC Genomics.* **11**:659.
- Lopez J, Colbourne J.** (2011). Dual-Labeled Expression Microarray Protocol for High-Throughput Genomic Investigations. *CGB Technical Report 2011.* **2.** doi: <http://dx.doi.org/10.2506/cgbtr-201102>.
- Lynn SE, Houtman AM, Weathers WW, Ketterson ED, Nolan V.** (2000). Testosterone increases activity but not daily energy expenditure in captive male dark-eyed juncos, *Junco hyemalis*. *Anim Behav.* **60.** 581-587.
- Maher AC, Fu MH, Isfort RJ, Varbanov AR, Qu XA, Tarnopolsky MA.** (2009). Sex Differences in Global mRNA Content of Human Skeletal Muscle. *PLoS ONE.* **4**:7.
- Mank JE.** (2007). The evolution of sexually selected traits and antagonistic androgen expression in actinopterygian fishes. *Am Nat.* **169**:1. 142-149.
- Marden JH.** (1987). Maximum lift production during takeoff in flying animals. *J Exp Biol.* **130.** 235-258.
- Marler CA, Moore MC.** (1988). Evolutionary costs of aggression revealed by testosterone manipulations in free-living male lizards. *Behav Ecol Sociobiol.* **23**:1. 21-26.
- Marler CA, Walsberg G, White ML, Moore M.** (1995). Increased Energy-Expenditure Due to Increased Territorial Defense in Male Lizards After Phenotypic Manipulation. *Behav Ecol Sociobiol.* **37**:4. 225-231.
- Michael H, Harkonen PL, Vaananen HK, Hentunen TA.** (2005). Estrogen and testosterone use different cellular pathways to inhibit osteoclastogenesis and bone resorption. *J Bone Miner Res.* **20**:12. 2224-2232.
- Miller AH.** (1941). Speciation in the avian species *Junco*. *Univ Calif Publ Zool.* **44**:3. 173-434.
- Miura Y, Kato H, Noguchi T.** (1992). *Brit J Nutr.* **67**:2. 257-265.
- Mock BA, Nacy CA.** (1988). Hormonal modulation of sex-differences in resistance to *Leishmania*-major systemic infections. *Infect Immun.* **56**:12. 3316-3319.
- Mokkonen M, Koskela E, Mappes T, Mills SC.** (2012). Sexual antagonism for testosterone maintains multiple mating behaviour. *Journal of Animal Ecology.* **81**:1. 277-283.
- Moller AP, Garamszegi LZ, Gil D, Hurtrez-Bousses S, Eens M.** (2005). Correlated evolution of male and female testosterone profiles in birds and its consequences. *Behav Ecol Sociobiol.* **58**:6. 534-544.
- Montano M, Flanagan JN, Jiang L, Sebastiani P, Rarick M, LeBrasseur NK, Morris CA, Jasuja R, Bhasin S.** (2007). Transcriptional profiling of testosterone-regulated genes in the skeletal muscle of human immunodeficiency virus-infected men experiencing weight loss. *J Clin Endocr Metab.* **92**:7. 2793-2802.
- Nakao A, Roijer E, Imamura T, Souchelnytskyi S, Stenman G, Heldin CH, tenDijke P.** (1997). Identification of Smad2, a human mad-related protein in the transforming growth factor beta signaling pathway. *Journal of Biological Chemistry.* **272**:5. 2896-2900.
- Nolan V, Ketterson ED, Cristol DA, Rogers CM, Clotfelter ED, Titus RC, Schoech SJ, Snajdr E** (2002). Dark-eyed Junco: *Junco hyemalis*. In *The birds of north america.* 716. (Ed. Poole A). pp. 1-44. Cornell Lab of Ornithology.
- Oda K, Matsuoka Y, Funahashi A, Kitano H.** (2005). A comprehensive pathway map of epidermal growth factor receptor signaling. *Mol Syst Biol.* **1**:2005.0010.
- Oppliger A, Giorgi MS, Conelli A, Nembrini M, John-Alder HB.** (2004). Effect of testosterone on

- immunocompetence, parasite load, and metabolism in the common wall lizard (*Podarcis muralis*). *Candaian Journal of Zoology-Reveu Canadienne de Zoologie*. **82**:11. 1713-1719.
- Oursler MJJ, Osdoby P, Pyfferoen J, Riggs BL, Spelsberg TC.** (1991). Avian osteoclasts as estrogen target-cells. *P Natl Acad Sci Usa*. **88**:15. 6613-6617.
- Park K, Park J, Ko J, Kim B, Kim H, Ahn K, Do K, Choi H, Kim H, Song S, Lee S, Jho S, Kong H, Yang Y, Jhun B, Kim C, Kim T, Hwang S, Bhak J, Lee H, Cho B.** (2012). Whole transcriptome analyses of six thoroughbred horses before and after exercise using RNA-Seq. *BMC Genomics*. **13**. 473.
- Pederson L, Kremer M, Judd J, Pascoe D, Spelsberg TC, Riggs BL, Oursler MJ.** (1999). Androgens regulate bone resorption activity of isolated osteoclasts in vitro. *P Natl Acad Sci Usa*. **96**:2. 505-510.
- Peterson M, Whittaker D, Ambreth S, Sureshchandra S, Mockatis K, Buechlein A, Choi J, Lai Z, Colbourne J, Tang H, Ketterson E.** (2012). De novo transcriptome sequencing in a songbird, the dark-eyed junco (*Junco hyemalis*): Genomic tools for an ecological model system. *BMC Genomics*. **13**:305.
- Peterson MP, Rosvall KA, Choi J, Ziegenfus C, Tang H, Colbourne JK, Ketterson ED.** (2013). Testosterone affects neural gene expression differently in male and female juncos: A role for hormones in mediating sexual dimorphism and conflict. *PLoS ONE*. **8**:4. e61784.
- Petry CJ, Ong KK, Wingate DL, Brown J, Scott CD, Jones EY, Pembrey ME, Dunger DB.** (2005). Genetic variation in the type 2 insulin-like growth factor receptor gene and disparity in childhood height. *Growth Hormone & IGF Research*. **15**:6. 363-368.
- Platt JL, Nath KA.** (1998). Heme oxygenase: Protective gene or Trojan horse. *Nat Med*. **4**:12. 1364-1365.
- Proctor NS.** (1993). *Manual of ornithology: avian structure and function*. Yale University Press.
- R Development Core Team.** (2010). R: A Language and Environment for Statistical. *R Foundation for Statistical Computing*. Vienna, Austria.
- Reed WL, Clark ME, Parker PG, Raouf SA, Arguedas N, Monk DS, Snajdr E, Nolan V, Ketterson ED.** (2006). Physiological effects on demography: A long-term experimental study of testosterone's effects on fitness. *American Naturalist*. **167**:5. 667-683.
- Reichard D, Ketterson E.** (2012). Estimation of female home-range size during the nestling period of Dark-eyed Juncos. *Wilson Journal of Ornithology*. **124**:3. 614-620.
- Rice W.** (1984). Sex-chromosomes and the evolution of sexual dimorphism. *Evolution Int J Org Evolution*. **38**:4. 735-742.
- Roberts ML, Buchanan KL, Evans MR.** (2004). Testing the immunocompetence handicap hypothesis: a review of the evidence. *Anim Behav*. **68**. 227-239.
- Roth SM, Ferrell RE, Peters DG, Metter EJ, Hurley BF, Rogers MA.** (2002). Influence of age, sex, and strength training on human muscle gene expression determined by microarray. *Physiol Genomics*. **10**:3. 181-190.
- Rowan W.** (1925). Relation of light to Bird migration and developmental changes. *Nature London*. **115**. pp. 494-495.
- Schramm L, Pendergrast PS, Sun YL, Hernandez N.** (2000). Different human TFIIB activities direct RNA polymerase III transcription from TATA-containing and TATA-less promoters. *Gene Dev*. **14**:20. 2650-2663.
- Schroeder A, Mueller O, Stocker S, Salowsky R, Leiber M, Gassmann M, Lightfoot S, Menzel W, Granzow M, Ragg T.** (2006). The RIN: an RNA integrity number for assigning integrity values to RNA measurements. *BMC Mol Biol*. **7**:3.
- Sebbag-Sznajder N, Raitskin O, Angenitzki M, Sato TA, Sperling J, Sperling R.** (2012). Regulation of alternative splicing within the supraspliceosome. *J Struct Biol*. **177**:1. 152-159.
- Sims RJ, Mandal SS, Reinberg D.** (2004). Recent highlights of RNA-polymerase-II-mediated

transcription. *Curr Opin Cell Biol.* **16**:3. 263-271.

**Smyth GK.** (2005). Limma: Linear models for microarray data. *Bioinformatics and computational biology solution using R and Bioconductor.* 397-420.

**Sterling D, Reithmeier RAF, Casey JR.** (2001). A transport metabolon. Functional interaction of carbonic anhydrase II and chloride/bicarbonate exchangers. *J Biol Chem.* **276**:51. 47886-47894.

**Storey J.** (2002). A direct approach to false discovery rates. *Journal of the Royal Statistical Society, Series B.* **64**:3. 479-498.

**van Doorn G.** (2009). Intralocus Sexual Conflict. *Ann N Y Acad Sci.* **1168.** 52-71.

**van Nas A, GuhaThakurta D, Wang SS, Yehya N, Horvath S, Zhang B, Ingram-Drake L, Chaudhuri G, Schadt EE, Drake TA, Arnold AP, Lulis AJ.** (2009). Elucidating the Role of Gonadal Hormones in Sexually Dimorphic Gene Coexpression Networks. *Endocrinology.* **150**:3. 1235-1249.

**Wakley GK, Schutte HD, Hannon KS, Turner RT.** (1991). Androgen treatment prevents loss of cancellous bone in the orchietomized rat. *J Bone Miner Res.* **6**:4. 325-330.

**Welle S, Tawil R, Thornton CA.** (2008). Sex-Related Differences in Gene Expression in Human Skeletal Muscle. *PLoS ONE.* **3**:1.

**Wikelski M, Lynn S, Breuner C, Wingfield JC, Kenagy GJ.** (1999). Energy metabolism, testosterone and corticosterone in white-crowned sparrows. *Journal of Comparative Physiology A-Sensory Neural and Behavioral Physiology.* **185**:5. 463-470.

**Wiley CJ, Goldizen AW.** (2003). Testosterone is correlated with courtship but not aggression in the tropical buff-banded rail, *Gallirallus philippensis.* *Horm Behav.* **43**:5. 554-560.

**Williamson DH, Krebs HA, Mellanby J.** (1962). Enzymic determination of d(-)-beta-hydroxybutyric acid and acetoacetic acid in blood. *Biochem J.* **82**:1. 90-&.

**Woodward CJH.** (1993). A reevaluation of the anabolic effect of testosterone in rats - interactions with gonadectomy, adrenalectomy and hypophysectomy. *Acta Endocrinol (Copenh).* **128**:5. 473-477.

**Xu XH, Coats JK, Yang CF, Wang A, Ahmed OM, Alvarado M, Izumi T, Shah NM.** (2012). Modular Genetic Control of Sexually Dimorphic Behaviors. *Cell.* **148**:3. 596-607.

**Yang X, Schadt EE, Wang S, Wang H, Arnold AP, Ingram-Drake L, Drake TA, Lulis AJ.** (2006). Tissue-specific expression and regulation of sexually dimorphic genes in mice. *Genome Res.* **16**:8. 995-1004.

**Yoder JA, Hawke NA, Eason DD, Mueller MG, Davids BJ, Gillin FD, Litman GW.** (2002). BIVM, a novel gene widely distributed among deuterostomes, shares a core sequence with an unusual gene in *Giardia lamblia.* *Genomics.* **79**:6. 750-755.

**Zagon IS, Donahue RN, Rogosnitzky M, McLaughlin PJ.** (2008). Imiquimod upregulates the opioid growth factor receptor to inhibit cell proliferation independent of immune function. *Exp Biol Med.* **233**:8. 968-979.

**Zheng XM, Black D, Chambon P, Egly JM.** (1990). Sequencing and expression of complementary-DNA for the general transcription factor-BTF3. *Nature.* **344**:6266. 556-559.

**Zysling DA, Greives TJ, Breuner CW, Casto JM, Dernas GE, Ketterson ED.** (2006). Behavioral and physiological responses to experimentally elevated testosterone in female dark-eyed juncos (*Junco hyemalis carolinensis*). *Horm Behav.* **50**:2. 200-207.

**A**

Liver

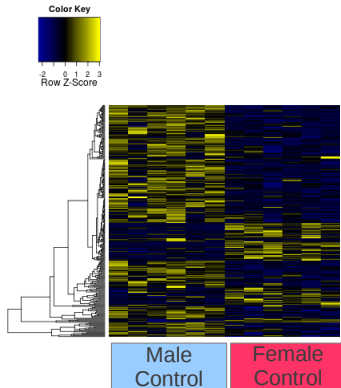**B**

Pectoralis

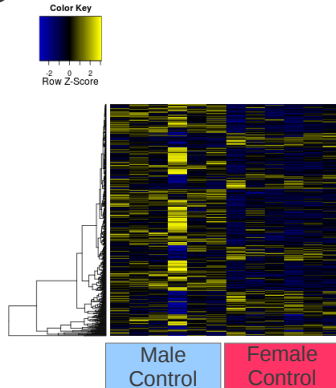**C**

Liver

Pectoralis

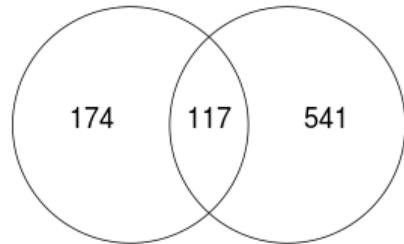

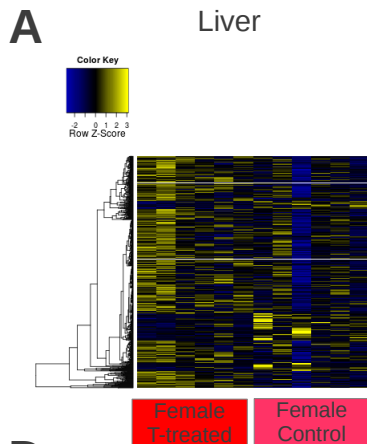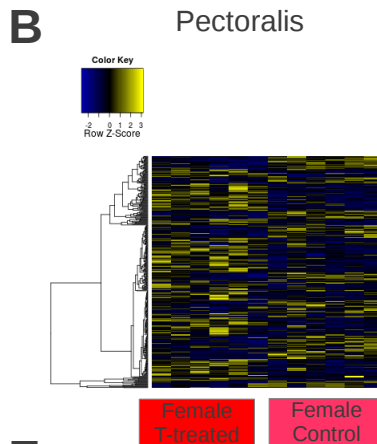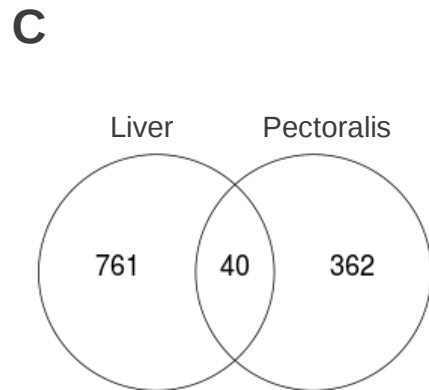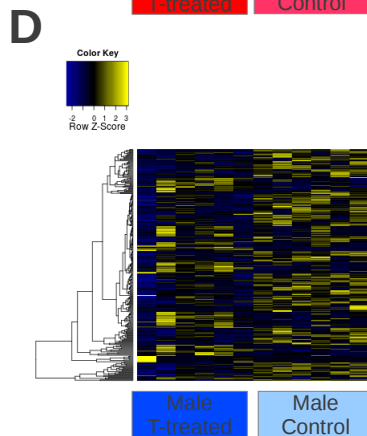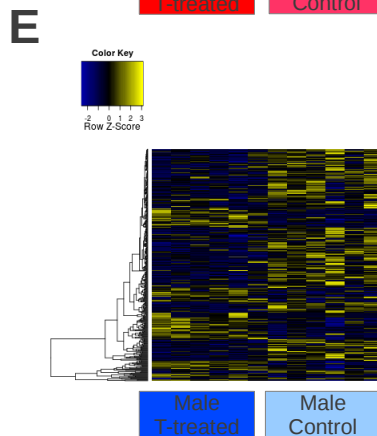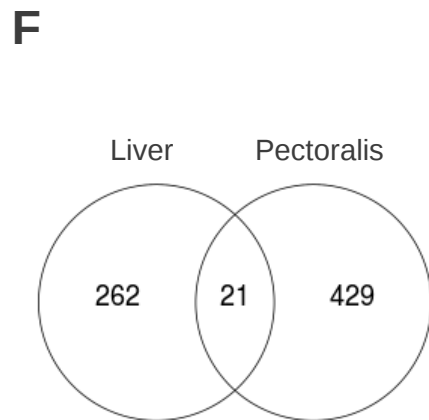



**A**Liver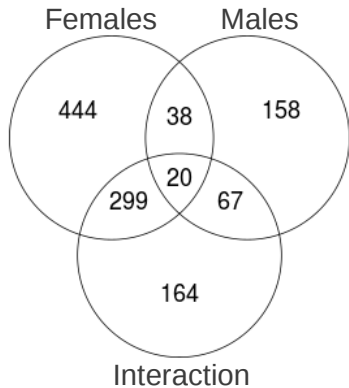**B**Pectoralis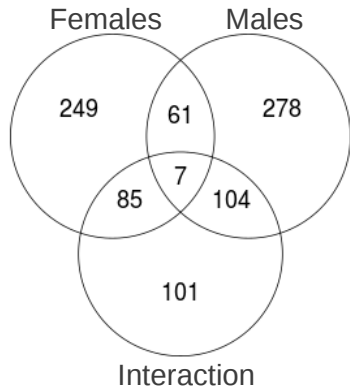

Source: https://cob.silverchair.com/jeb/article-pdf/doi/10.1242/jeb.089813/2036660/jeb_089813.pdf
